# Supplementary material
Source: PubMed Central journal article supplement (PMC10999004)
Supplement: jama-e244011-s003.pdf [file jama-e244011-s003.pdf]

\*Indicates required information. Only first name, last name, and suffix will appear in PubMed.

| <b>*Group Name: CAP Trial Group</b>      |                   |                              |                  |                                                                                 |                                          |                                                         |                                                       |
|------------------------------------------|-------------------|------------------------------|------------------|---------------------------------------------------------------------------------|------------------------------------------|---------------------------------------------------------|-------------------------------------------------------|
| <b>*First Name and Middle Initial(s)</b> | <b>*Last Name</b> | <b>*Suffix (eg, Jr, III)</b> | Academic Degrees | Institution                                                                     | Location (city, state/province, country) | Role or Contribution, eg, chair, principal investigator | Subgroup (eg, Steering Committee)                     |
| Steven                                   | Oliver            |                              | PhD              | University of York and Hull York Medical School                                 | York, UK                                 | Epidemiologist                                          | Investigator                                          |
| Peter                                    | Brindle           |                              | MB ChB, BSc, MD  | Bristol, North Somerset, and South Gloucestershire Clinical Commissioning Group | Bristol, UK                              | General Practitioner                                    | Investigator                                          |
| Simon                                    | Evans             |                              | MB ChB           | Royal United Hospital                                                           | Bath, UK                                 | Urologist                                               | Investigator                                          |
| Stephen                                  | Frankel           |                              | MD, PhD          | University of Bristol                                                           | Bristol, UK                              | Epidemiologist                                          | Investigator                                          |
| Liz                                      | Down              |                              | MSc              | University of Bristol                                                           | Bristol, UK                              | Data Manager                                            | Research Staff                                        |
| Marta                                    | Tazewell          |                              | MSc              | University of Bristol                                                           | Bristol, UK                              | Data administrator                                      | Research Staff                                        |
| Pete                                     | Shiarly           |                              |                  | University of Bristol                                                           | Bristol, UK                              | Database Developer                                      | Research Staff                                        |
| Joanna                                   | Thorn             |                              | BSc, PhD         | University of Bristol                                                           | Bristol, UK                              | Health Economist                                        | Investigator                                          |
| Sean                                     | Harrison          |                              | PhD              | University of Bristol                                                           | Bristol, UK                              | Statistician                                            | Investigator                                          |
| Luke                                     | Hounsome          |                              | PhD              | Public Health England                                                           | Bristol, UK                              | Public Health England                                   | Investigator                                          |
| Charlotte                                | Davies            |                              | BSc, PhD         | University of Bristol                                                           | Bristol, UK                              | Fieldworker                                             | Research Staff                                        |
| Laura                                    | Hughes            |                              |                  | University of Cambridge                                                         | Cambridge, UK                            | Fieldworker                                             | Research Staff                                        |
| Mari-Anne                                | Rowlands          |                              | PhD              | University of Bristol                                                           | Bristol, UK                              | Fieldworker                                             | Research Staff                                        |
| Lindsey                                  | Bell              |                              |                  | University of Bristol                                                           | Bristol, UK                              | Fieldworker                                             | Research Staff                                        |
| Elizabeth                                | Hill              |                              | MSc              | University of Bristol                                                           | Bristol, UK                              | Fieldworker                                             | Research Staff                                        |
| Siaw Yein                                | Ng                |                              |                  | University of Bristol                                                           | Bristol, UK                              | Fieldworker                                             | Research Staff                                        |
| Naomi                                    | Williams          |                              |                  | University of Bristol                                                           | Bristol, UK                              | Fieldworker                                             | Research Staff                                        |
| Jessica                                  | Toole             |                              |                  | University of Bristol                                                           | Bristol, UK                              | Fieldworker                                             | Research Staff                                        |
| Michael                                  | Baum              |                              | FRCS, ChM        | King's College                                                                  | London, UK                               | Chair                                                   | Trial Steering Committee and Cause of Death Committee |
| Tracy                                    | Roberts           |                              | RGN, BSc, PhD    | University of Birmingham                                                        | Birmingham, UK                           | Member                                                  | Trial Steering Committee                              |
| Mary                                     | Robinson          |                              | MD               | University of Oxford                                                            | Oxford, UK                               | Member                                                  | Trial Steering Committee / Cause of Death Committee   |

## Supplemental Online Content: Nonauthor Collaborators

\*Indicates required information. Only first name, last name, and suffix will appear in PubMed.

| *First Name and Middle Initial(s) | *Last Name | *Suffix (eg, Jr, III) | Academic Degrees | Institution                                       | Location (city, state/province, country) | Role or Contribution, eg, chair, principal investigator | Subgroup (eg, Steering Committee) |
|-----------------------------------|------------|-----------------------|------------------|---------------------------------------------------|------------------------------------------|---------------------------------------------------------|-----------------------------------|
| David                             | Dearnaley  |                       | MD               | The Royal Marsden                                 | London, UK                               | Member                                                  | Trial Steering Committee          |
| Fritz                             | Schröder   |                       | MD, PhD          | Erasmus University                                | Rotterdam, Netherlands                   | Member                                                  | Trial Steering Committee          |
| Tim                               | Peters     |                       | BSc, PhD         | University of Bristol                             | Bristol, UK                              | Member                                                  | Trial Steering Committee          |
| Teresa                            | Lennon     |                       |                  | Freeman Hospital                                  | Newcastle, UK                            | Member                                                  | Trial Steering Committee          |
| Sue                               | Bonnington |                       |                  | Leicester General Hospital                        | Leicester, UK                            | Member                                                  | Trial Steering Committee          |
| Lars                              | Holmberg   |                       | DPhil, MD        | King's College                                    | London, UK                               | Member                                                  | Data Monitoring Committee         |
| Robert                            | Pickard    |                       | MD               | Newcastle University                              | Newcastle, UK                            | Member                                                  | Data Monitoring Committee         |
| Simon                             | Thompson   |                       | PhD, FMedSci     | University of Cambridge                           | Cambridge, UK                            | Member                                                  | Data Monitoring Committee         |
| Usha                              | Menon      |                       | MBBS, MD         | University College London                         | London, UK                               | Member                                                  | Data Monitoring Committee         |
| Jon                               | McFarlane  |                       | BA, MB, BChir    | Royal United Hospitals Bath NHS Foundation Trust  | Bath, UK                                 | Member                                                  | Cause of Death Committee          |
| Richard                           | Bryant     |                       | MBChB, PhD       | University of Oxford                              | Oxford, UK                               | Member                                                  | Cause of Death Committee          |
| John                              | Dormer     |                       | BSc, MBCh        | University Hospitals of Leicester NHS Trust       | Leicester, UK                            | Member                                                  | Cause of Death Committee          |
| Colette                           | Reid       |                       | MD, MBChB        | University Hospitals Bristol NHS Foundation Trust | Bristol, UK                              | Member                                                  | Cause of Death Committee          |
| Amit                              | Bahl       |                       | MBBS, MD         | University Hospitals Bristol NHS Foundation Trust | Bristol, UK                              | Member                                                  | Cause of Death Committee          |
| Anthony                           | Koupparis  |                       | BSc, MBChB, MD   | North Bristol NHS Trust                           | Bristol, UK                              | Member                                                  | Cause of Death Committee          |
| David                             | Gunnell    |                       | PhD, DSc         | University of Bristol                             | Bristol, UK                              | Member                                                  | Cause of Death Committee          |
