# Supplementary material
Source: PubMed Central journal article supplement (PMC10999004)
Supplement: jama-e244011-s004.pdf [file jama-e244011-s004.pdf]

# Data Sharing Statement

Martin. Prostate-Specific Antigen Screening and 15-Year Prostate Cancer Mortality. *JAMA*. Published April 06, 2024. doi:10.1001/jama.2024.4011

## Data

**Data available:** No

## Additional Information

**Explanation for why data not available:** As part of UK Section 251 permission given to the trial by the Health Research Authority Confidentiality Advisory Group (CAG) and approvals granted by third party data providers who provide access to electronic health records, we have agreed to a number of conditions that restrict our ability to share these data for purposes outside of the trial: 1. The specified patient identifiable information is only used for the purpose(s) set out in the application; 2. Confidentiality is preserved and there are no disclosures of information in aggregate or patient level form that may inferentially identify a person, nor will any attempt be made to identify individuals, households or organisations in the data. We also state in our Data Security Protection Toolkit, that we only share data in exceptional circumstances for purposes outside of the trial where it is not disclosive – i.e. in aggregate form, or derived to reduce the risk of disclosure and where collaborators demonstrate legitimate use, ethical approval and acceptable levels of data security as long as these do not breach our Section 251/third party data provider conditions. However, we will seek all relevant regulatory and sponsorship approvals for long-term data preservation and data sharing for secondary analysis in the final year of our 20 year follow-up in 2026. This will require negotiation with key stakeholders to secure appropriate approvals and permissions to retain data, including third party data (such as NHS Digital and Welsh Cancer Intelligence and Surveillance Unit (WCISU)). We will also need to maintain CAG approval through annual reporting, submitting annual NHS Data Security Protection toolkit (DSPT) reports and reviewing and updating the Data Protection Impact Assessment (DPIA) in collaboration with the University of Bristol Information Governance Manager and Data Protection Officer.
